# Supplementary material
Source: PubMed Central journal article supplement (PMC6777120)
Supplement: ao9b02268_si_003.pdf [file ao9b02268_si_003.pdf]

**Synthesis of two mononuclear Schiff-base metal (M = Fe, Cu) complexes:  
MOF structure, dye degradation, H<sub>2</sub>O<sub>2</sub> sensing and DNA binding property**

Mithun Kumar Ghosh<sup>†</sup>, Sayantan Pathak<sup>‡</sup> and Tanmay Kumar Ghorai<sup>\*†</sup>

<sup>†</sup>Nanomaterials and Crystal Designing Laboratory, Department of Chemistry  
Indira Gandhi National Tribal University, Amarkantak, M.P-484887, India

<sup>‡</sup>Department of Chemistry, University of Gour Banga, Malda, W.B. India

**\*Corresponding Author: Email: [tanmay.ghorai@igntu.ac.in](mailto:tanmay.ghorai@igntu.ac.in)/[tanmayghorai66@gmail.com](mailto:tanmayghorai66@gmail.com),**

Mob.: 9432512461;

## Electronic Supplementary Information

### List of Contents:

**Figure S1: <sup>1</sup>HNMR of Schiff base ligand**

**Figure S2. FT-IR of (a) Complex 1 and (b) complex 2**

**Figure S3: MOF at (100) 'a' axis in central projection of complex 2**

**Table: S1. Selected geometric information of the complex 1**

**Table S2. Selected geometric information of the complex 2**

# ESI 1. $^1\text{H}$ NMR of the Schiff base ligand

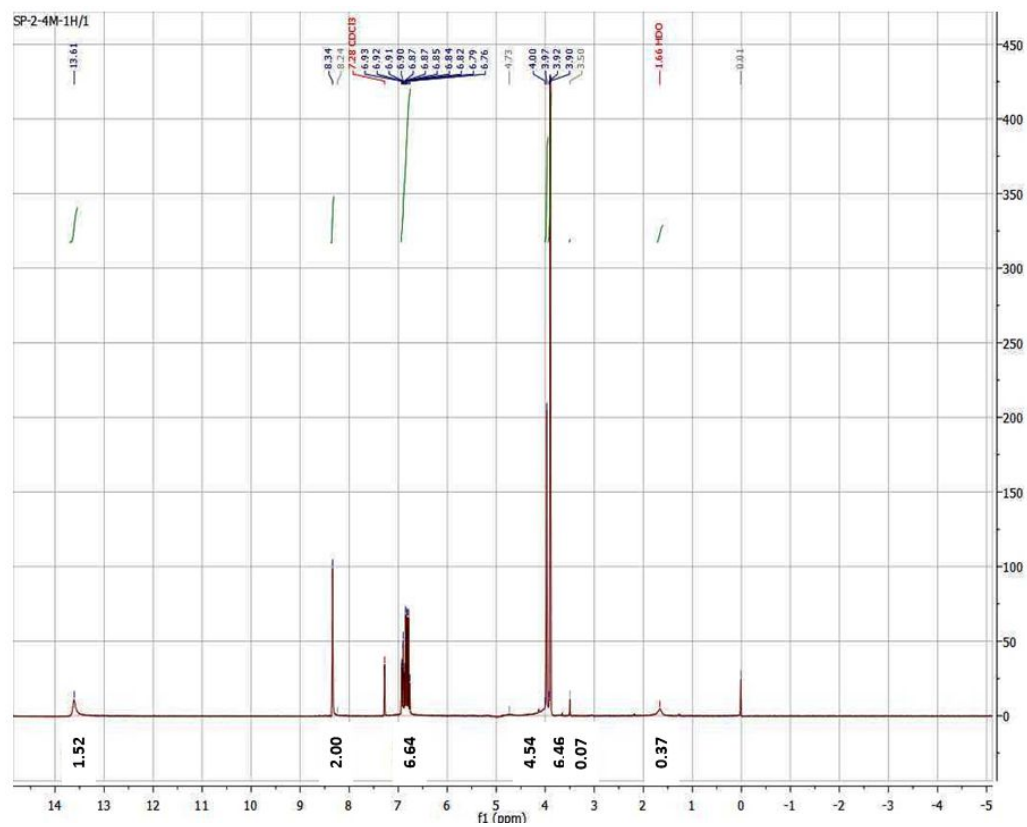

Figure S1:  $^1\text{H}$ NMR of Schiff base ligand

**ESI 2: FT-IR analysis**

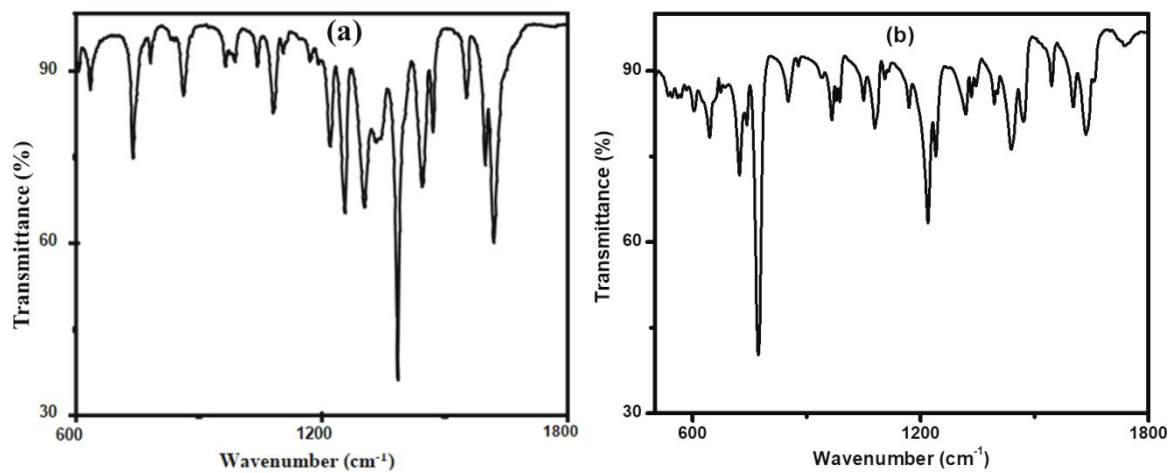

**Figure S2. FT-IR of (a) Complex 1 and (b) complex 2**

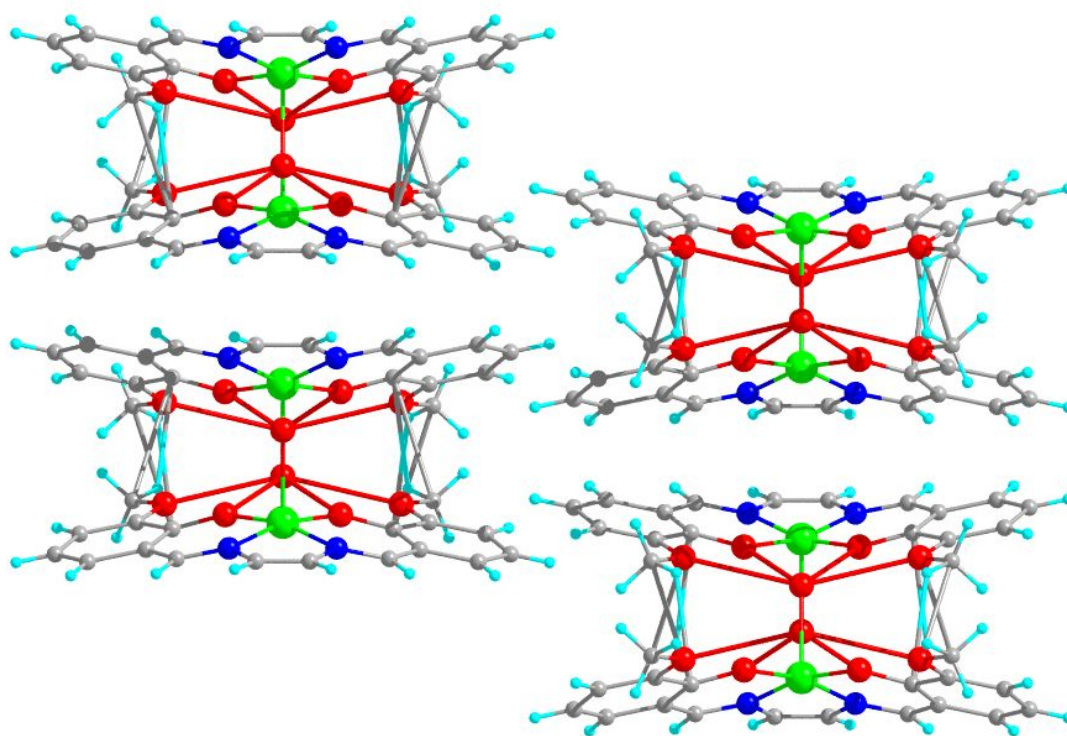

Figure S3: MOF at (100) 'a' axis in central projection of complex 2

**Table S1. Selected geometric information of the complex 1**

| Atoms 1,2 | d 1,2 [Å]  | Atoms 1,2 | d 1,2 [Å] |
|-----------|------------|-----------|-----------|
| Fe1—O1    | 1.882 (16) | C8—C13    | 1.408(4)  |
| Fe1—O2    | 1.866 (21) | C8—C9     | 1.415(4)  |
| Fe1—O5    | 2.316 (13) | C13—C14   | 1.438(5)  |
| Fe1—O6    | 2.088 (26) | C13—C12   | 1.413(4)  |
| Fe1—N1    | 2.094 (26) | C7—H7     | 0.9300    |
| Fe1—N2    | 2.075 (27) | C9—C10    | 1.382(5)  |
| O1—C1     | 1.316(3)   | C3—H3     | 0.9300    |
| O5—H5A    | 0.8504     | C3—C4     | 1.384(5)  |
| O5—H5B    | 0.8503     | C5—H5     | 0.9300    |
| O2—C8     | 1.320(3)   | C5—C4     | 1.370(5)  |
| O3—C2     | 1.361(3)   | C14—H14   | 0.9300    |
| O3—C17    | 1.420(3)   | C4—H4     | 0.9300    |
| O4—C9     | 1.356(4)   | C17—H17A  | 0.9600    |
| O4—C18    | 1.423(4)   | C17—H17B  | 0.9600    |
| O6—H6A    | 0.8507     | C17—H17C  | 0.9600    |
| O6—H6B    | 0.8505     | C12—H12   | 0.9300    |
| N1—C7     | 1.285(4)   | C12—C11   | 1.377(7)  |
| N1—C15    | 1.473(4)   | C10—H10   | 0.9300    |
| N2—C14    | 1.284(4)   | C10—C11   | 1.391(6)  |
| N2—C16    | 1.478(4)   | C11—H11   | 0.9300    |
| N3—O8     | 1.226(4)   | C16—H16A  | 0.9700    |
| N3—O9     | 1.196(4)   | C16—H16B  | 0.9700    |
| N3—O7     | 1.204(4)   | C16—C15   | 1.485(6)  |
| C1—C2     | 1.410(3)   | C15—H15A  | 0.9700    |
| C1—C6     | 1.407(4)   | C15—H15B  | 0.9700    |
| C2—C3     | 1.379(4)   | C18—H18A  | 0.9600    |
| C6—C7     | 1.437(4)   | C18—H18B  | 0.9600    |
| C6—C5     | 1.414(4)   | C18—H18C  | 0.9600    |

| Atoms 1,2,3 | Angle 1,2,3 [°] | Atoms 1,2,3 | Angle 1,2,3 [°] |
|-------------|-----------------|-------------|-----------------|
| O1—Fe1—O5   | 89.57(8)        | N1—C7—H7    | 117.400         |
| O1—Fe1—O2   | 101.45(8)       | C6—C7—H7    | 117.400         |
| O1—Fe1—O6   | 93.26(9)        | O4—C9—C8    | 113.7(3)        |
| O1—Fe1—N1   | 88.99(8)        | O4—C9—C10   | 126.4(3)        |
| O1—Fe1—N2   | 168.06(9)       | C10—C9—C8   | 119.9(3)        |
| O2—Fe1—O5   | 92.04(8)        | C2—C3—H3    | 119.900         |
| O2—Fe1—O6   | 91.91(9)        | C2—C3—C4    | 120.3(3)        |
| O2—Fe1—N1   | 169.56(9)       | C4—C3—H3    | 119.900         |
| O2—Fe1—N2   | 89.63(9)        | C6—C5—H5    | 119.800         |
| O6—Fe1—O5   | 174.60(9)       | C4—C5—C6    | 120.5(3)        |
| O6—Fe1—N1   | 87.28(10)       | C4—C5—H5    | 119.800         |
| N1—Fe1—O5   | 88.17(8)        | N2—C14—C13  | 125.5(3)        |
| N2—Fe1—O5   | 85.57(9)        | N2—C14—H14  | 117.200         |
| N2—Fe1—O6   | 90.77(10)       | C13—C14—H14 | 117.200         |
| N2—Fe1—N1   | 79.98(9)        | C3—C4—H4    | 119.600         |
| C1—O1—Fe1   | 132.62(15)      | C5—C4—C3    | 120.8(3)        |

|             |            |               |          |
|-------------|------------|---------------|----------|
| Fe1—O5—H5A  | 109.300    | C5—C4—H4      | 119.600  |
| Fe1—O5—H5B  | 109.500    | O3—C17—H17A   | 109.500  |
| H5A—O5—H5B  | 109.500    | O3—C17—H17B   | 109.500  |
| C8—O2—Fe1   | 131.50(18) | O3—C17—H17C   | 109.500  |
| C2—O3—C17   | 118.0(2)   | H17A—C17—H17B | 109.500  |
| C9—O4—C18   | 118.3(3)   | H17A—C17—H17C | 109.500  |
| Fe1—O6—H6A  | 109.400    | H17B—C17—H17C | 109.500  |
| Fe1—O6—H6B  | 109.400    | C13—C12—H12   | 119.800  |
| H6A—O6—H6B  | 109.400    | C11—C12—C13   | 120.3(4) |
| C7—N1—Fe1   | 125.76(18) | C11—C12—H12   | 119.800  |
| C7—N1—C15   | 121.1(2)   | C9—C10—H10    | 119.900  |
| C15—N1—Fe1  | 112.8(2)   | C9—C10—C11    | 120.2(4) |
| C14—N2—Fe1  | 125.1(2)   | C11—C10—H10   | 119.900  |
| C14—N2—C16  | 121.9(3)   | C12—C11—C10   | 121.0(3) |
| C16—N2—Fe1  | 112.9(2)   | C12—C11—H11   | 119.500  |
| O9—N3—O8    | 123.6(4)   | C10—C11—H11   | 119.500  |
| O9—N3—O7    | 116.7(4)   | N2—C16—H16A   | 109.700  |
| O7—N3—O8    | 119.7(4)   | N2—C16—H16B   | 109.700  |
| O1—C1—C2    | 116.9(2)   | N2—C16—C15    | 109.8(3) |
| O1—C1—C6    | 123.8(2)   | H16A—C16—H16B | 108.200  |
| C6—C1—C2    | 119.3(2)   | C15—C16—H16A  | 109.700  |
| O3—C2—C1    | 114.0(2)   | C15—C16—H16B  | 109.700  |
| O3—C2—C3    | 125.7(2)   | N1—C15—C16    | 110.0(3) |
| C3—C2—C1    | 120.3(3)   | N1—C15—H15A   | 109.700  |
| C1—C6—C7    | 123.5(2)   | N1—C15—H15B   | 109.700  |
| C1—C6—C5    | 118.8(3)   | C16—C15—H15A  | 109.700  |
| C5—C6—C7    | 117.6(3)   | C16—C15—H15B  | 109.700  |
| O2—C8—C13   | 123.5(3)   | H15A—C15—H15B | 108.200  |
| O2—C8—C9    | 116.6(3)   | O4—C18—H18A   | 109.500  |
| C13—C8—C9   | 119.9(3)   | O4—C18—H18B   | 109.500  |
| C8—C13—C14  | 123.5(3)   | O4—C18—H18C   | 109.500  |
| C8—C13—C12  | 118.7(3)   | H18A—C18—H18B | 109.500  |
| C12—C13—C14 | 117.7(3)   | H18A—C18—H18C | 109.500  |
| N1—C7—C6    | 125.3(2)   | H18B—C18—H18C | 109.500  |

**Table S2. Selected geometric information of the complex 2**

| Atoms 1,2  | d 1,2 [Å]  | Atoms 1,2              | d 1,2 [Å] |
|------------|------------|------------------------|-----------|
| Cu1-N1/N1' | 1.942(45), | C007—C009              | 1.434(6)  |
| Cu1-O1/O1' | 1.932(28)  | C008—C00B              | 1.379(7)  |
| Cu1-O3     | 2.330(28)  | C009—C00C              | 1.420(7)  |
| Cu1-N1/N1' | 1.942(45), | C00A—H00A              | 0.9800    |
| Cu1-O1/O1' | 1.932(28)  | C00A—H00B              | 0.9800    |
| O1—C006    | 1.309(5)   | C00A—H00C              | 0.9800    |
| O2—C008    | 1.369(5)   | C00B—H00D              | 0.9500    |
| O2—C00A    | 1.423(5)   | C00B—C00D              | 1.384(8)  |
| N1—C007    | 1.285(7)   | C00C—H00E              | 0.9500    |
| N1—C00E    | 1.450(6)   | C00C—C00D              | 1.356(8)  |
| C006—C008  | 1.427(6)   | C00D—H00F              | 0.9500    |
| C006—C009  | 1.411(6)   | C00E—C00E <sup>i</sup> | 1.289(14) |
| C007—H007  | 0.9500     | C00E—H00G              | 0.9500    |

| Atoms 1,2,3                          | Angle 1,2,3 [°] | Atoms 1,2,3                  | Angle 1,2,3 [°] |
|--------------------------------------|-----------------|------------------------------|-----------------|
| O1—Cu1—O1 <sup>i</sup>               | 90.48(16)       | C00B—C008—C006               | 121.5(4)        |
| O1 <sup>i</sup> —Cu1—O3              | 98.47(11)       | C006—C009—C007               | 122.4(4)        |
| O1—Cu1—O3                            | 98.42(11)       | C006—C009—C00C               | 120.8(4)        |
| O1—Cu1—N1                            | 92.30(15)       | C00C—C009—C007               | 116.8(4)        |
| O1—Cu1—N1 <sup>i</sup>               | 166.99(18)      | O2—C00A—H00A                 | 109.500         |
| O1 <sup>i</sup> —Cu1—N1 <sup>i</sup> | 92.30(15)       | O2—C00A—H00B                 | 109.500         |
| O1 <sup>i</sup> —Cu1—N1              | 167.01(18)      | O2—C00A—H00C                 | 109.500         |
| N1—Cu1—O3                            | 93.67(17)       | H00A—C00A—H00B               | 109.500         |
| N1 <sup>i</sup> —Cu1—O3              | 93.73(17)       | H00A—C00A—H00C               | 109.500         |
| N1 <sup>i</sup> —Cu1—N1              | 82.3(3)         | H00B—C00A—H00C               | 109.500         |
| C006—O1—Cu1                          | 126.6(3)        | C008—C00B—H00D               | 119.400         |
| C008—O2—C00A                         | 116.8(3)        | C008—C00B—C00D               | 121.3(5)        |
| C007—N1—Cu1                          | 127.5(3)        | C00D—C00B—H00D               | 119.400         |
| C007—N1—C00E                         | 120.0(4)        | C009—C00C—H00E               | 119.500         |
| C00E—N1—Cu1                          | 112.2(4)        | C00D—C00C—C009               | 121.0(4)        |
| O1—C006—C008                         | 118.1(4)        | C00D—C00C—H00E               | 119.500         |
| O1—C006—C009                         | 125.9(4)        | C00B—C00D—H00F               | 120.300         |
| C009—C006—C008                       | 116.0(4)        | C00C—C00D—C00B               | 119.3(5)        |
| N1—C007—H007                         | 117.500         | C00C—C00D—H00F               | 120.300         |
| N1—C007—C009                         | 125.0(4)        | N1—C00E—H00G                 | 122.100         |
| C009—C007—H007                       | 117.500         | C00E <sup>i</sup> —C00E—N1   | 115.8(3)        |
| O2—C008—C006                         | 113.4(4)        | C00E <sup>i</sup> —C00E—H00G | 122.100         |
| O2—C008—C00B                         | 125.1(4)        |                              |                 |
